# Supplementary material for: Prognostic Value of CXCR2 in Breast Cancer
Source: PubMed Central journal article supplement (PMC7465124; doi:10.3390/cancers12082076), 2020-07-27
Supplement: cancers-12-02076-s001.pdf [file cancers-12-02076-s001.pdf]

Article

# Prognostic Value of CXCR2 in Breast Cancer

Florence Boissière-Michot, William Jacot, Julien Fraisse, Sophie Gourgou, Colin Timaxian and Gwendal Lazennec

## Supplementary Materials

**Table S1.** Immuno-histochemical reagents and protocols.

| Target | Type              | Clone      | Source Reference    | Antigen Retrieval | Dilution | Staining Protocol                   | IHC Validation |
|--------|-------------------|------------|---------------------|-------------------|----------|-------------------------------------|----------------|
| CXCR2  | Rabbit polyclonal | -          | LSBio LS-A804       | -                 | -        | -                                   | No             |
| CXCR2  | Mouse monoclonal  | 5E8-C7-F10 | Affimetrix #12-1829 | -                 | -        | -                                   | No             |
| CXCR2  | Mouse monoclonal  | 48-311     | R&D systems MAB331  | -                 | -        | -                                   | No             |
| CXCR2  | Mouse monoclonal  | 6D499      | Acris AM08392       | -                 | -        | -                                   | No             |
| CXCR2  | Mouse monoclonal  | 19         | InVitrogen AHR1532  | pH 9              | 1/500    | Linker mouse<br>Envision™<br>Flex+  | Yes            |
| CXCR2  | Mouse monoclonal  | E-2        | Santa Cruz Sc-7304  | pH 9              | 1/500    | Linker mouse<br>Envision™<br>Flex+  | Yes            |
| CXCR2  | Rabbit polyclonal | -          | Atlas Ab HPA03199   | pH 6.1            | 1/100    | Linker rabbit<br>Envision™<br>Flex+ | Yes            |
| CD11b  | Rabbit monoclonal | EP45       | BioSB BSB 6440      | pH 9              | 1/400    | Linker rabbit<br>Envision™<br>Flex+ | Yes            |
| CD66b  | Mouse monoclonal  | 80H3       | Bio-Rad MCA216      | pH 6.1            | 1/200    | Envision™ Flex                      | Yes            |

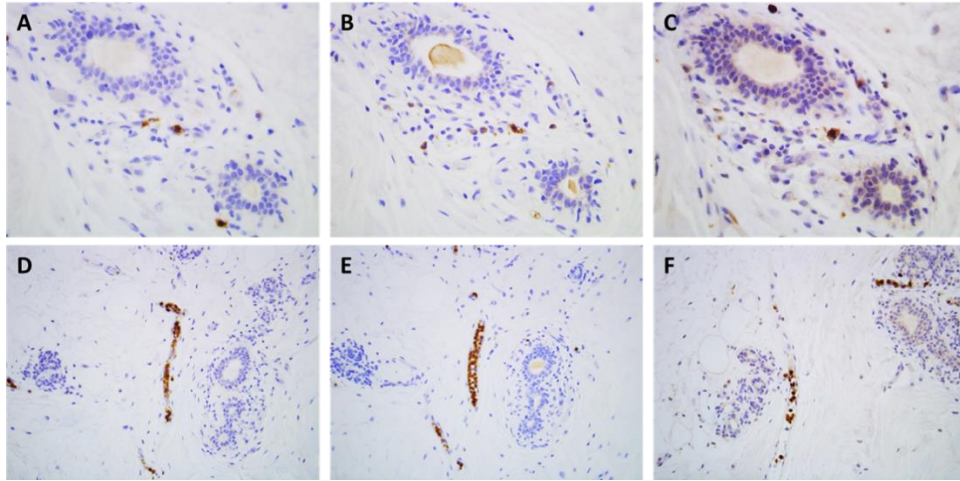

**Figure S1.** Representative examples of CXCR2 staining in formalin-fixed paraffin-embedded samples. Immunostaining of CXCR2 in serial sections of human breast samples using 3 Ab (**A** and **D**: clone E-2; **B** and **E**: rabbit polyclonal Ab HPA03199; **C** and **F**: clone 19). Note a consistent pattern between the 3 Ab with staining of scattered cells within the stroma (**A,B,C**) and inside blood vessels (**D,E,F**), and absence of staining of epithelial cells. Immuno-peroxidase 400× (**A,B,C**), 200× (**D,E,F**).

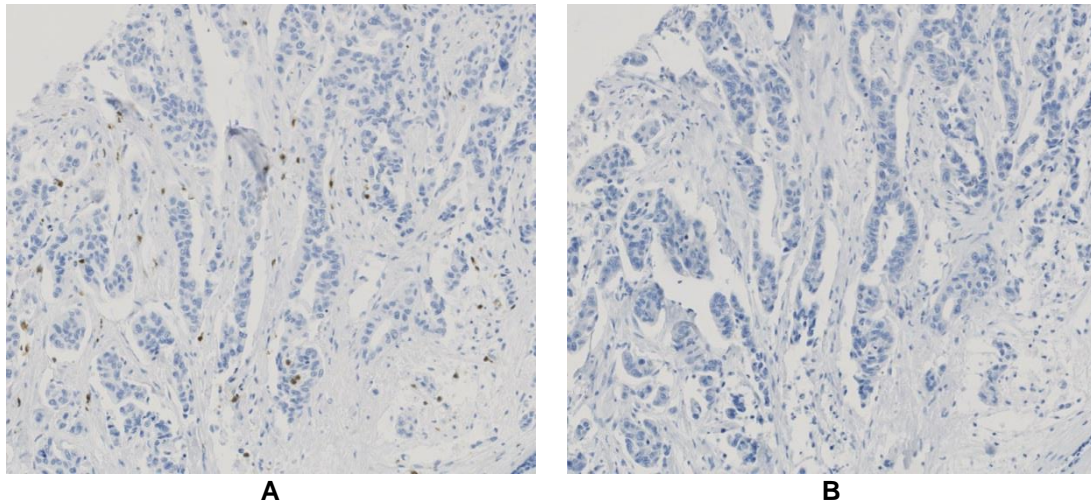

**Figure S2.** Validation of the CXCR2 immuno-staining in invasive breast carcinoma. (**A**) One section was labelled with the E-2 mouse monoclonal IgG1 anti-CXCR2 Ab at 0.4 µg/mL. (**B**) Serial section was processed as the section shown in A, but with irrelevant IgG1 used at the same concentration. Immuno-peroxidase 200×.

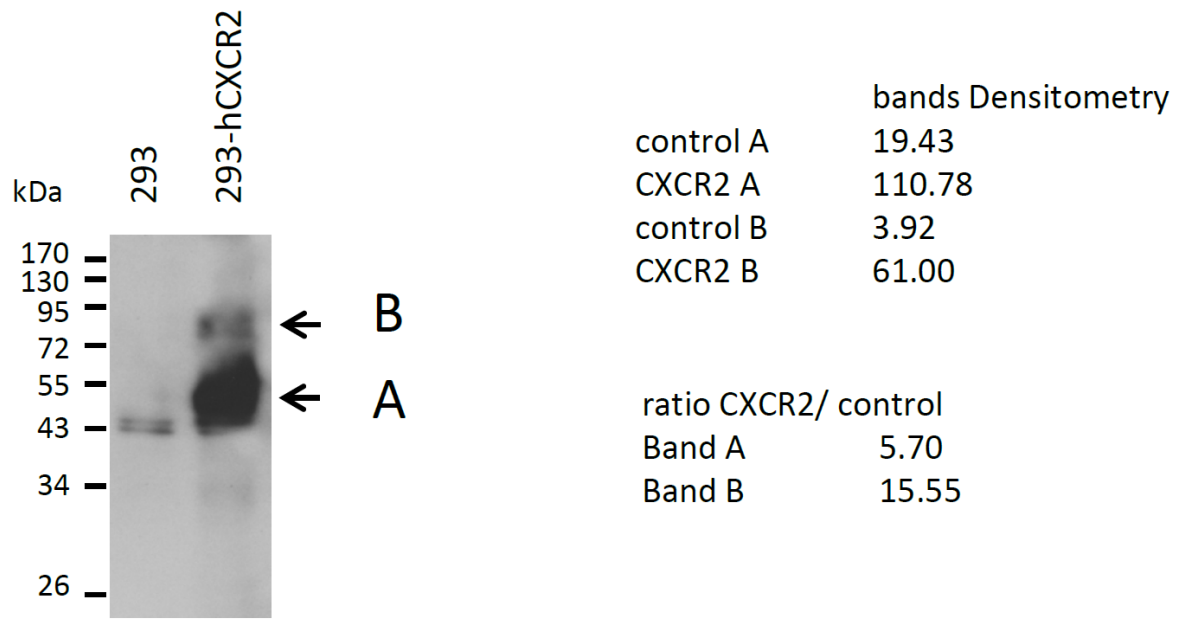

Figure S3. Whole Western Blot for figure 2A.
